# Supplementary material for: Artificial Intelligence Applied to Improve Scientific Reviews: The Antibacterial Activity of Cistus Plants as Proof of Concept
Source: MDPI journal article supplement (doi:10.3390/antibiotics12020327), 2023-02-04
Supplement: s1 [file s1]

Article

# Artificial Intelligence Applied to Improve Scientific Reviews: The Antibacterial Activity of *Cistus* Plants as Proof of Concept

Francisco Javier Álvarez-Martínez <sup>1</sup>, Fernando Borrás-Rocher <sup>2</sup>, Vicente Micol <sup>1,3,\*,†</sup>  
and Enrique Barraón-Catalán <sup>1,4,†</sup>

<sup>1</sup> Instituto de Investigación, Desarrollo e Innovación en Biotecnología Sanitaria de Elche (IDiBE), Universidad Miguel Hernández (UMH), 03202 Elche, Spain

<sup>2</sup> Statistics and Operative Research Department, UMH, Avda, Universidad s/n, 03202 Elche, Spain

<sup>3</sup> CIBER, Fisiopatología de la Obesidad y la Nutrición, CIBERobn, Instituto de Salud Carlos III (CB12/03/30038), 28029 Madrid, Spain

<sup>4</sup> Department of Pharmacy, Elche University Hospital-FISABIO, 03203 Elche, Spain

\* Correspondence: vmicol@umh.es; Tel.: +34-965-222-586

† Both authors share senior authorship.

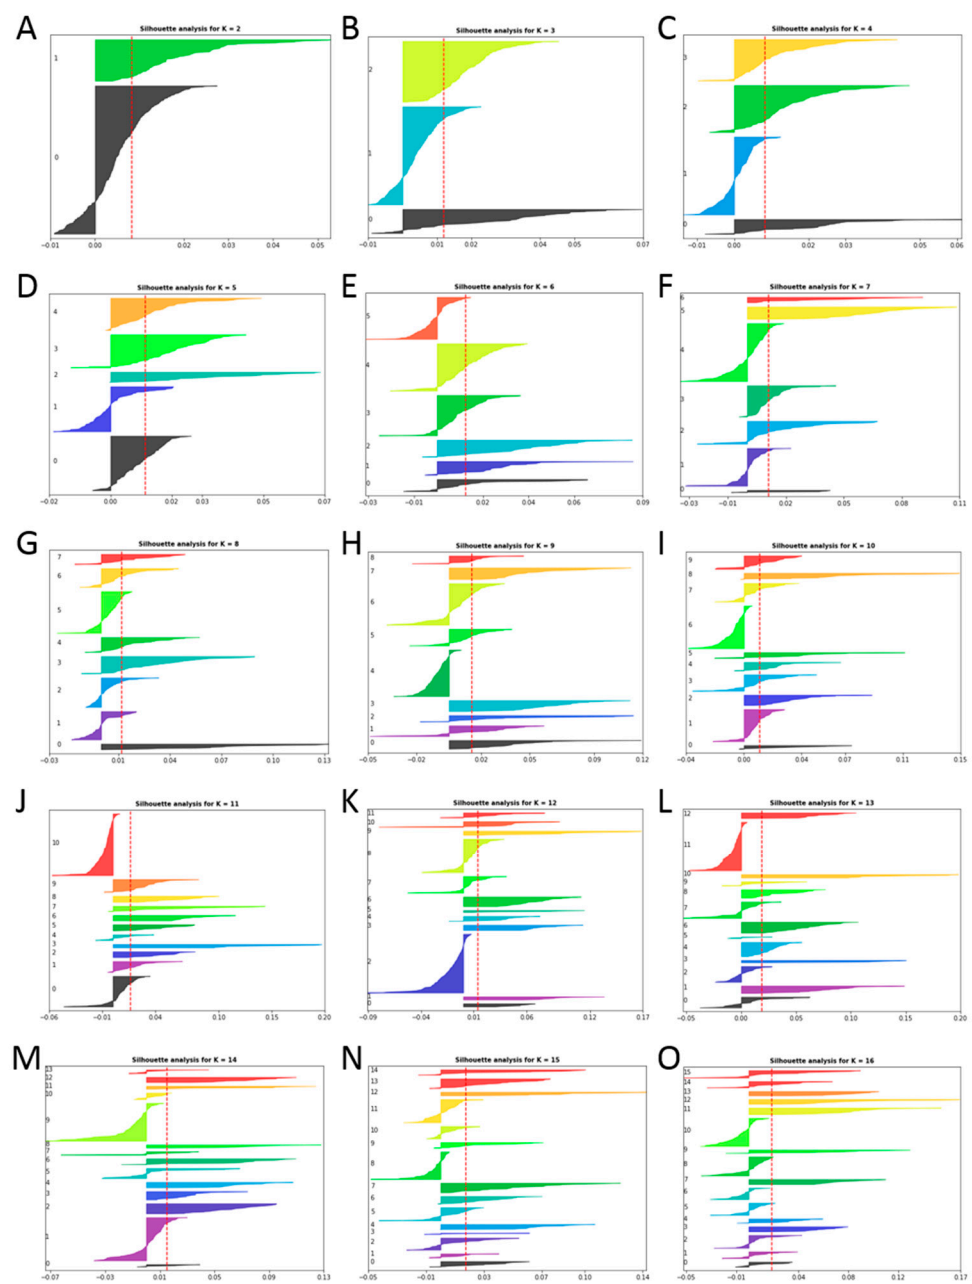

**Figure S1.** Silhouette plots for the different cluster numbers tested for the Open Access *Cistus* articles dataset up to 16 (A–O).

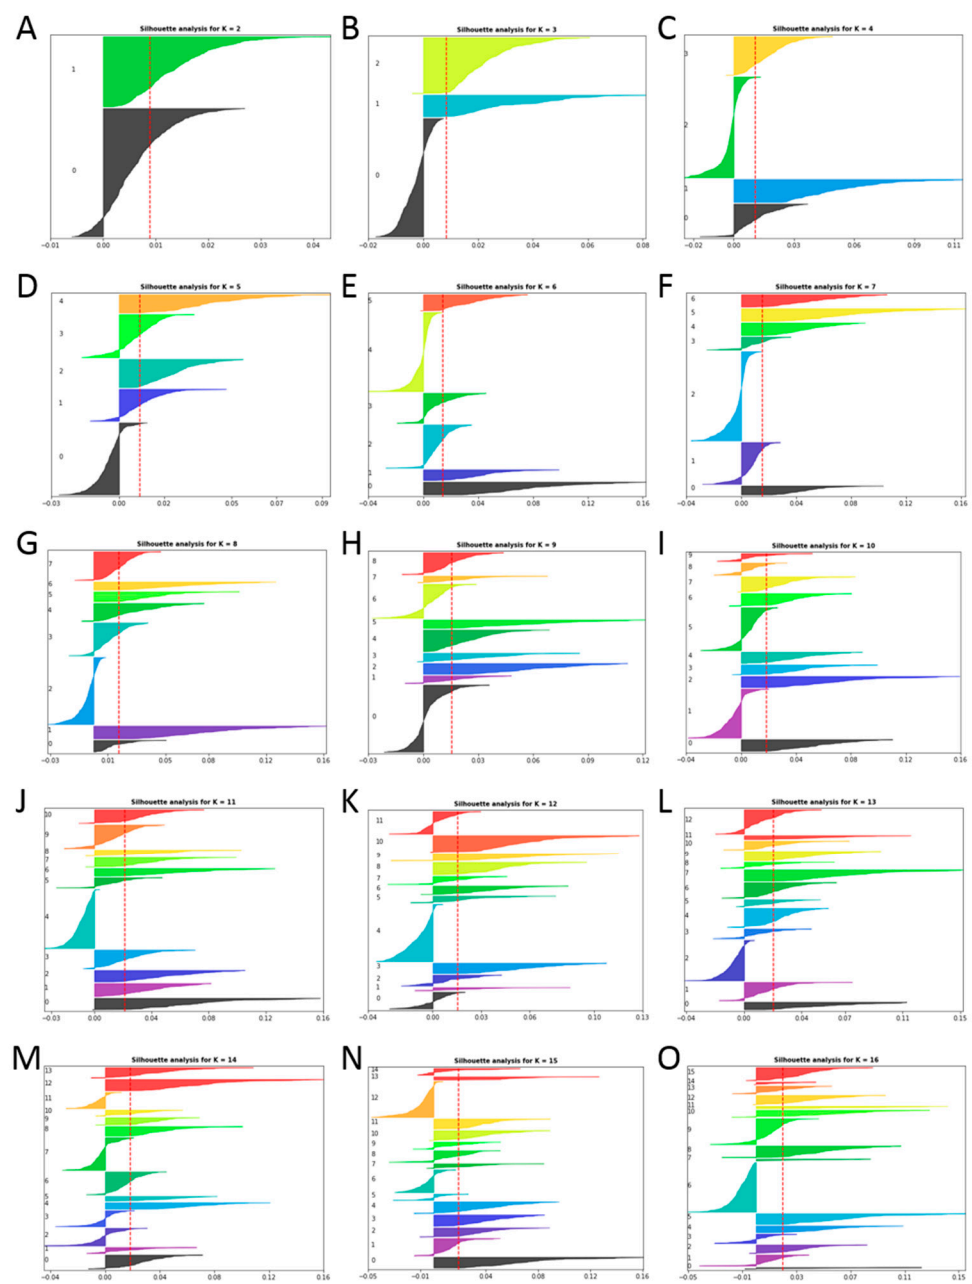

**Figure S2.** Silhouette plots for the different cluster numbers tested for the non-Open Access *Cistus* articles dataset up to 16 (A–O).

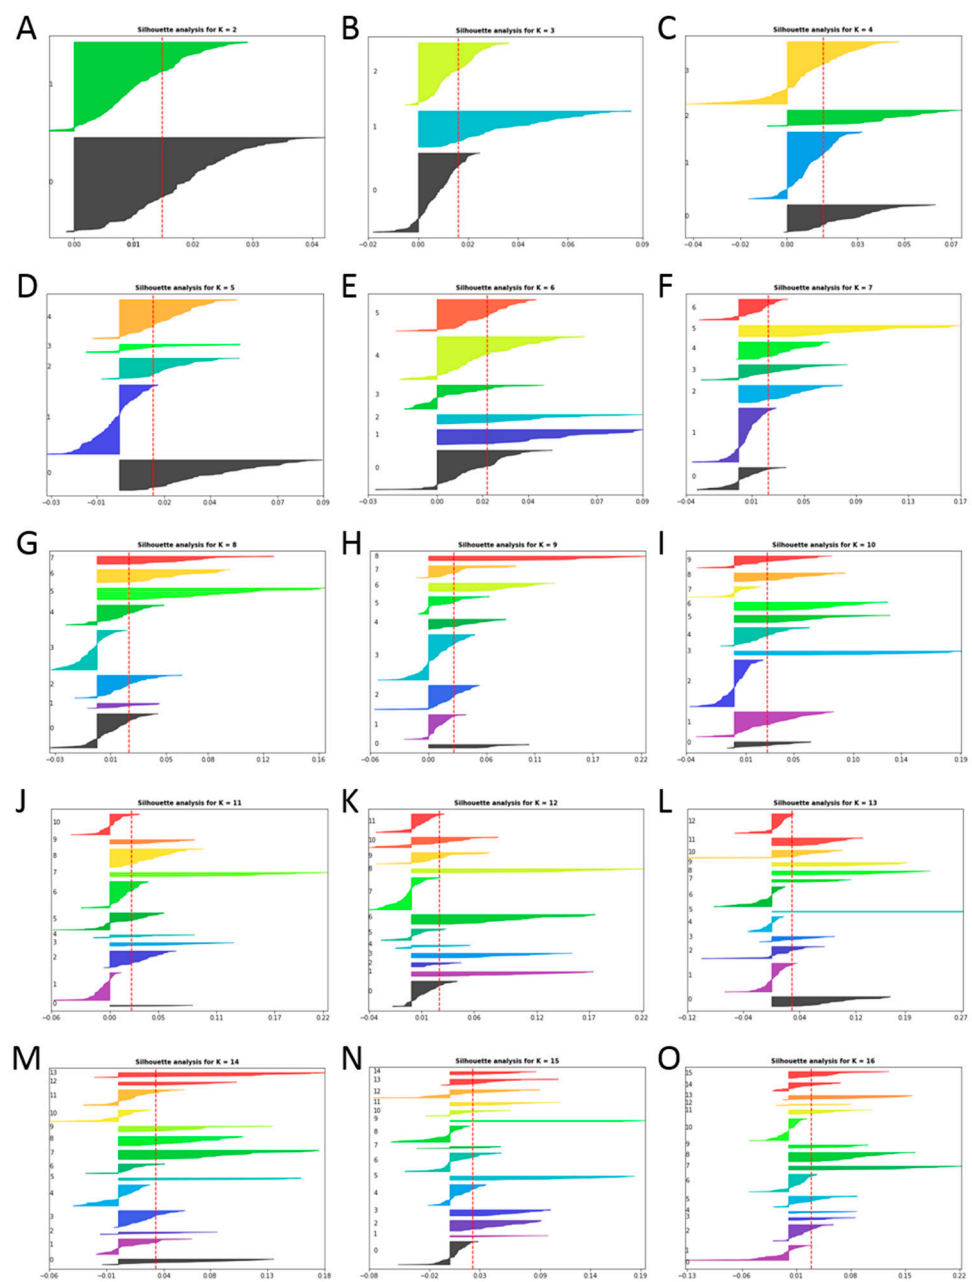

**Figure S3.** Silhouette plots for the different cluster numbers tested for the top 20% most cited *Cistus* articles dataset up to 16 (A–O).

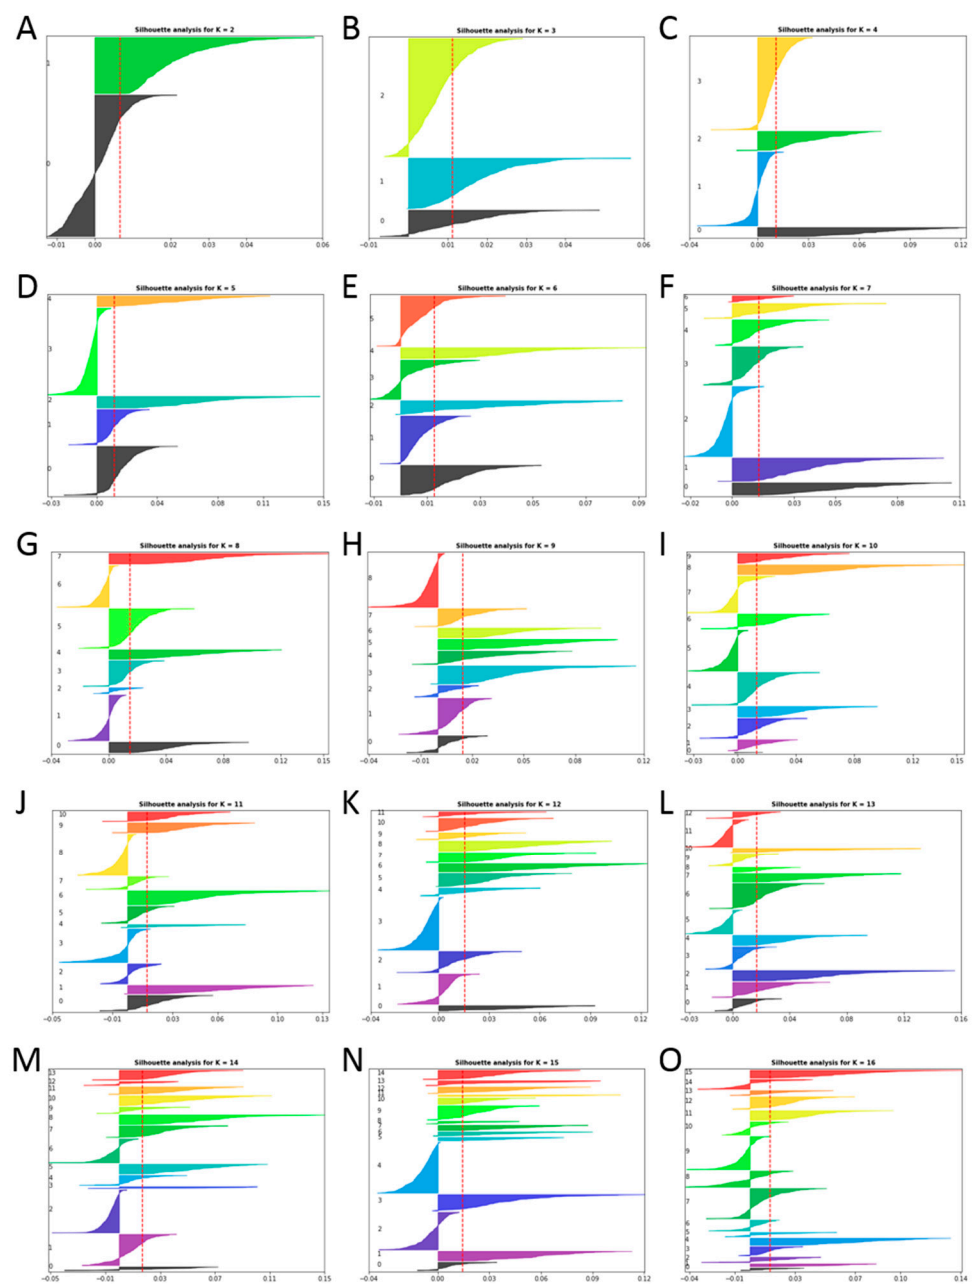

**Figure S4.** Silhouette plots for the different cluster numbers tested for the 80% least cited *Cistus* articles dataset up to 16 (A–O).

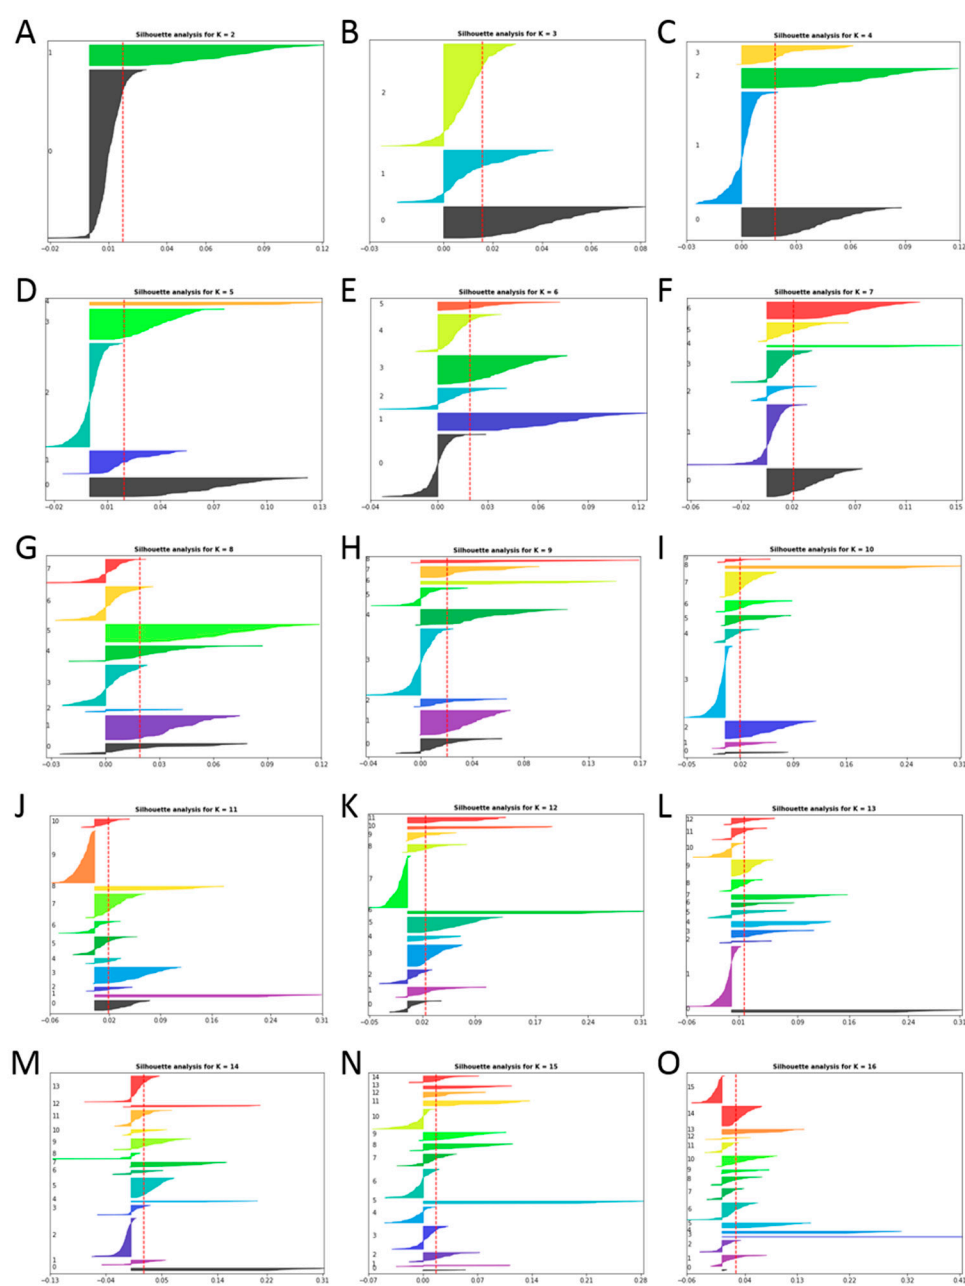

**Figure S5.** Silhouette plots for the different subcluster numbers tested for the bioactive Cluster 1 dataset up to 16 (A–O).
